# Supplementary material for: Assessment of Academic Performance: A Shared Experience From Jazan Faculty of Medicine, Saudi Arabia and a Proposal for Systematic Monitoring and Evaluation
Source: Research Square preprint supplement (doi:10.21203/rs.3.rs-322262/v1), 2021-03-22
Supplement: Supplementary file 1 [file 96b46f4866992c33bd99fb7c.docx]

Additional File 1: An example of research ranking weightage :

| Research Ranking weightage | Publication weightage | 70% | 35% | Publication as single/ first author (ISI journals). |
| --- | --- | --- | --- | --- |
| **15%** | Publication as coauthor (ISI journals) |
| **25%** | Publication as single/ first author (books and chapters). |
| **10%** | Publications in Non-ISI journals (regardless to authorship order). |
| **15%** | number of yearly citations. |
|  |  |
| **Ongoing research weightage** | **30%** | **50%** | Securing financial funding/ grants for conducted research. |
| **20%** | Being a principle investigator. |
| **20%** | Being a supervisor for students research. |
| **10%** | Being a co-investigator. |
